# Supplementary material for: Automated Landmark Annotation for Morphometric Analysis of Distal Femur and Proximal Tibia
Source: MDPI journal article supplement (doi:10.3390/jimaging10040090), 2024-04-11
Supplement: s1 [file s1]

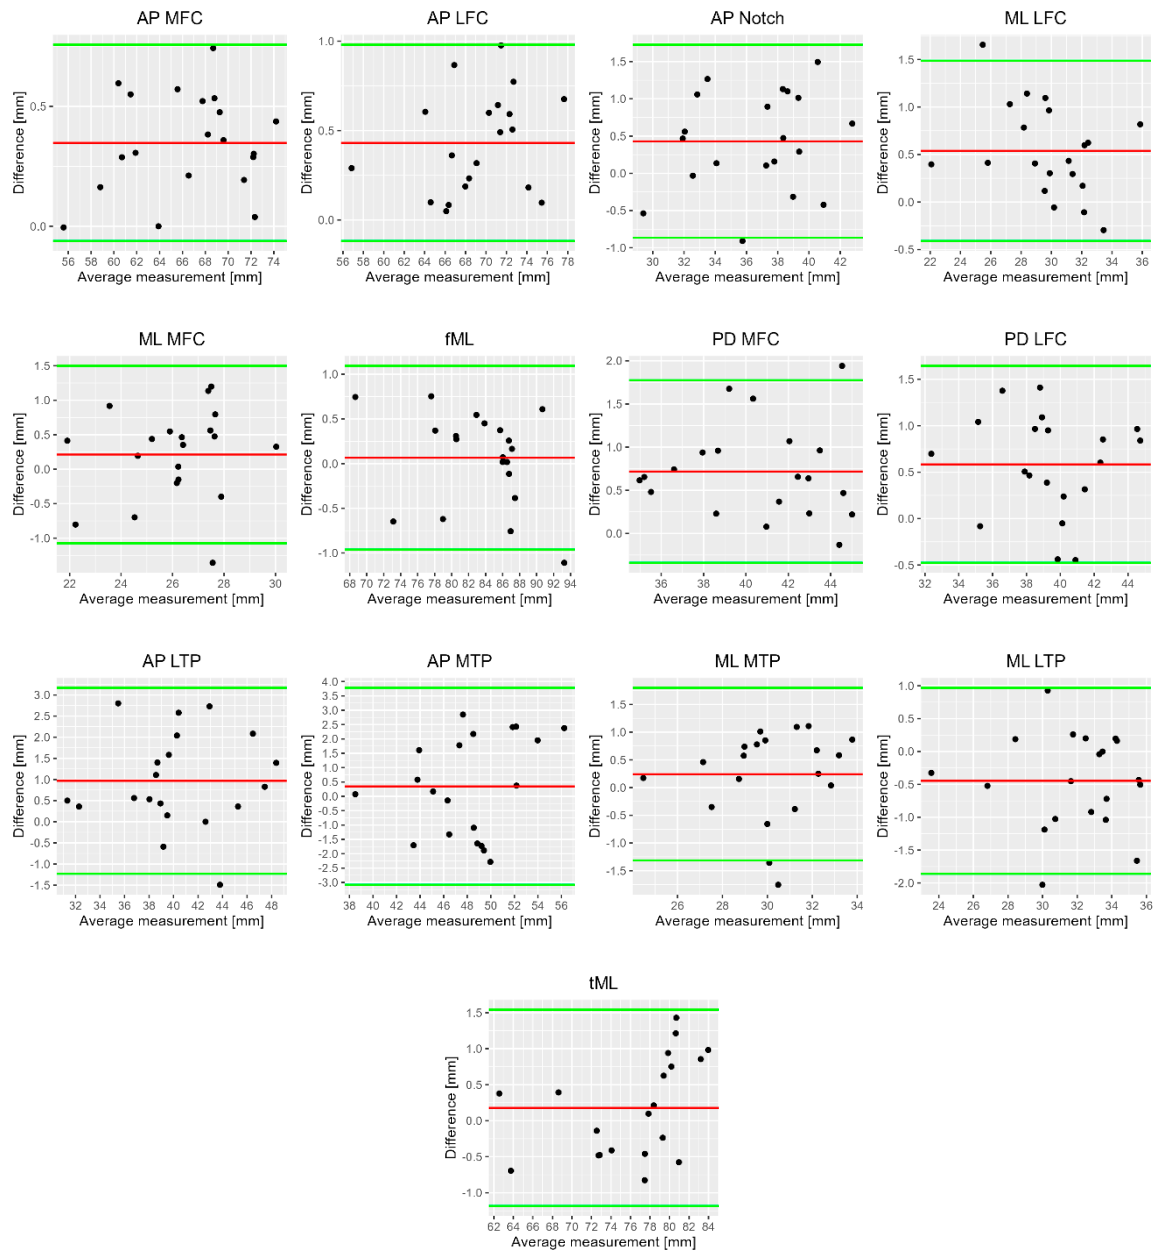

**Figure S1:** Bland Altman inter-method agreement plots for all measurements: differences between the manual and automated measurement (mm) are plotted in function of the average of the manual and automated measurement.

## Landmark positioning outliers

Table S1: Number of outliers in landmark positioning differences per knee scan for each of the described experiments: intra-observer, inter-observer and manual versus automated.

| Scan         | Number of outliers (intra-observer) | Number of outliers (inter-observer) | Number of outliers (manual versus automated) |
|--------------|-------------------------------------|-------------------------------------|----------------------------------------------|
| #1           | 0                                   | 5                                   | 0                                            |
| #2           | 2                                   | 1                                   | 0                                            |
| #3           | 6                                   | 5                                   | 2                                            |
| #4           | 3                                   | 2                                   | 1                                            |
| #5           | 3                                   | 2                                   | 0                                            |
| #6           | 0                                   | 5                                   | 4                                            |
| #7           | 1                                   | 2                                   | 1                                            |
| #8           | 0                                   | 3                                   | 0                                            |
| #9           | 5                                   | 1                                   | 0                                            |
| #10          | 8                                   | 0                                   | 0                                            |
| #11          | 6                                   | 1                                   | 1                                            |
| #12          | 2                                   | 3                                   | 0                                            |
| #13          | 3                                   | 1                                   | 0                                            |
| #14          | 0                                   | 0                                   | 0                                            |
| #15          | 0                                   | 6                                   | 0                                            |
| #16          | 1                                   | 2                                   | 0                                            |
| #17          | 6                                   | 5                                   | 2                                            |
| #18          | 9                                   | 2                                   | 0                                            |
| #19          | 3                                   | 2                                   | 2                                            |
| #20          | 3                                   | 0                                   | 0                                            |
| <b>Total</b> | <b>61</b>                           | <b>48</b>                           | <b>13</b>                                    |

## Measurement outliers

Table S2: Number of outliers in measurement differences per knee scan for each of the described experiments: intra-observer, inter-observer and manual versus automated.

| Scan         | Number of outliers (intra-observer) | Number of outliers (inter-observer) | Number of outliers (manual versus automated) |
|--------------|-------------------------------------|-------------------------------------|----------------------------------------------|
| #1           | 1                                   | 7                                   | 0                                            |
| #2           | 0                                   | 0                                   | 0                                            |
| #3           | 2                                   | 0                                   | 0                                            |
| #4           | 1                                   | 0                                   | 0                                            |
| #5           | 1                                   | 0                                   | 0                                            |
| #6           | 0                                   | 1                                   | 0                                            |
| #7           | 0                                   | 2                                   | 0                                            |
| #8           | 0                                   | 2                                   | 0                                            |
| #9           | 2                                   | 0                                   | 0                                            |
| #10          | 5                                   | 1                                   | 1                                            |
| #11          | 4                                   | 0                                   | 0                                            |
| #12          | 1                                   | 1                                   | 0                                            |
| #13          | 4                                   | 0                                   | 1                                            |
| #14          | 3                                   | 0                                   | 0                                            |
| #15          | 1                                   | 1                                   | 0                                            |
| #16          | 2                                   | 1                                   | 0                                            |
| #17          | 4                                   | 6                                   | 1                                            |
| #18          | 3                                   | 2                                   | 0                                            |
| #19          | 0                                   | 0                                   | 0                                            |
| #20          | 3                                   | 0                                   | 0                                            |
| <b>Total</b> | <b>37</b>                           | <b>24</b>                           | <b>3</b>                                     |
